# Supplementary material
Source: PubMed Central journal article supplement (PMC5772768)

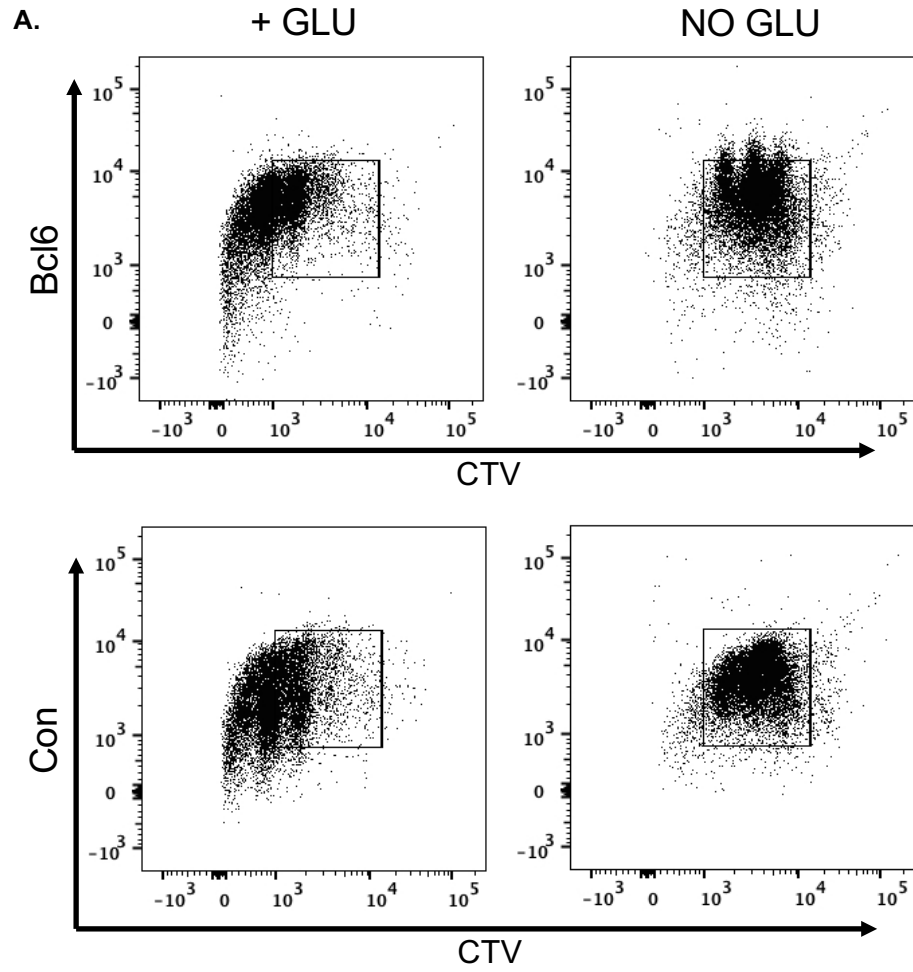

**B.** Supplemental Figure 1

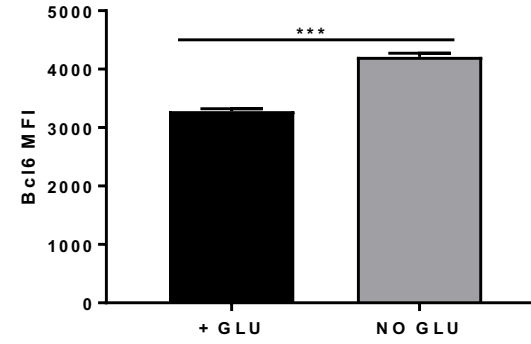

**C.**

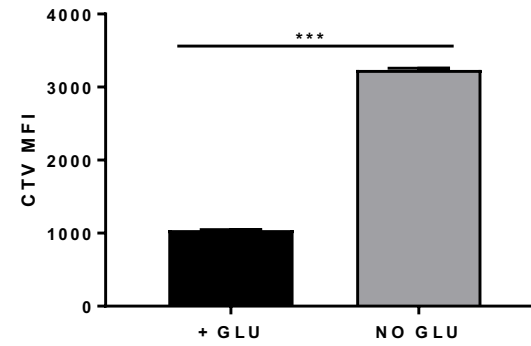

Supplement: NIHMS928832-supplement-supplement_1.pdf [file NIHMS928832-supplement-supplement_1.pdf]
